# Supplementary material for: Viral Retasking of hBre1/RNF20 to Recruit hPaf1 for Transcriptional Activation
Source: PubMed Central journal article supplement (PMC3681745; doi:10.1371/journal.ppat.1003411), 2013-06-13
Supplement: ppat.1003411.s001.pdf [file ppat.1003411.s001.pdf]

Figure S1

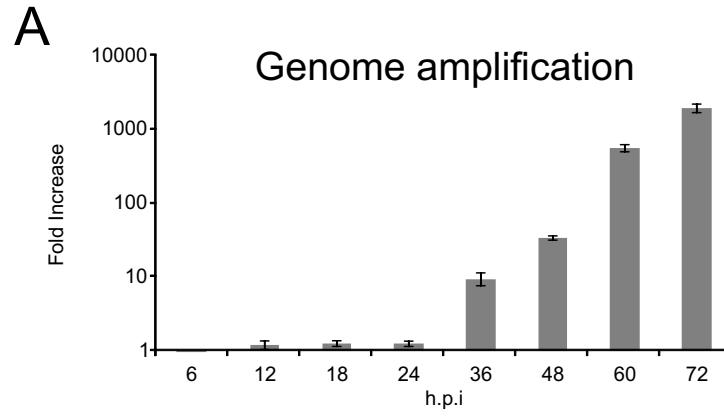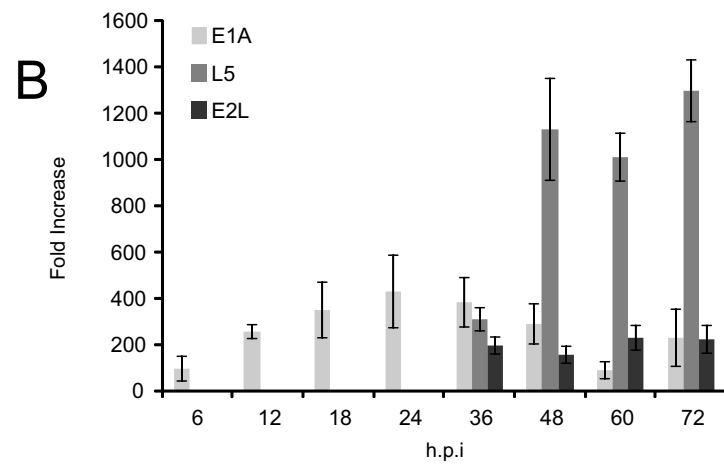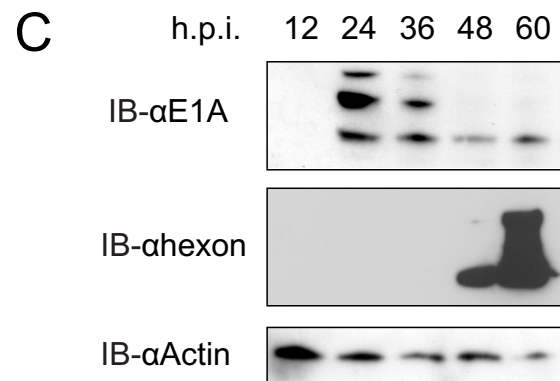

Figure S2

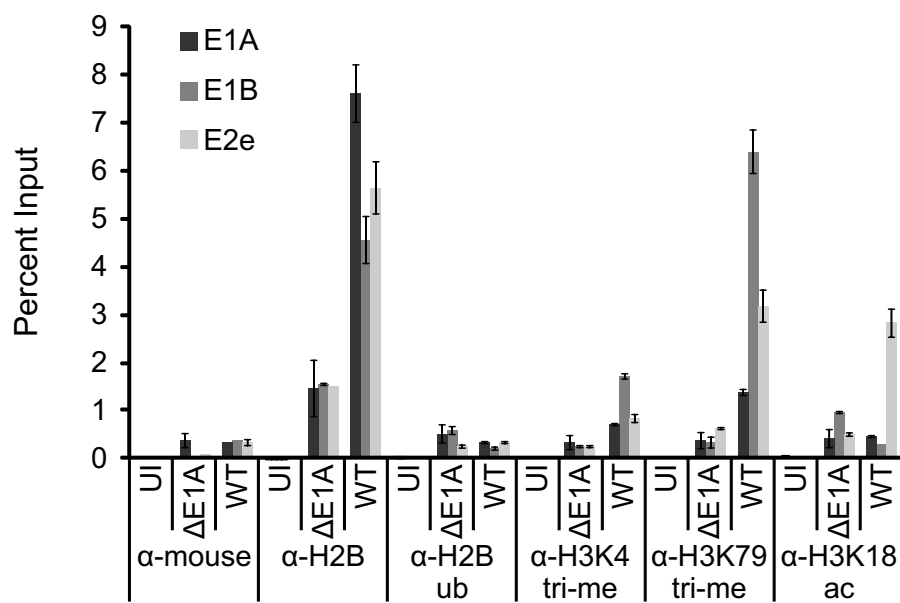

Figure S3

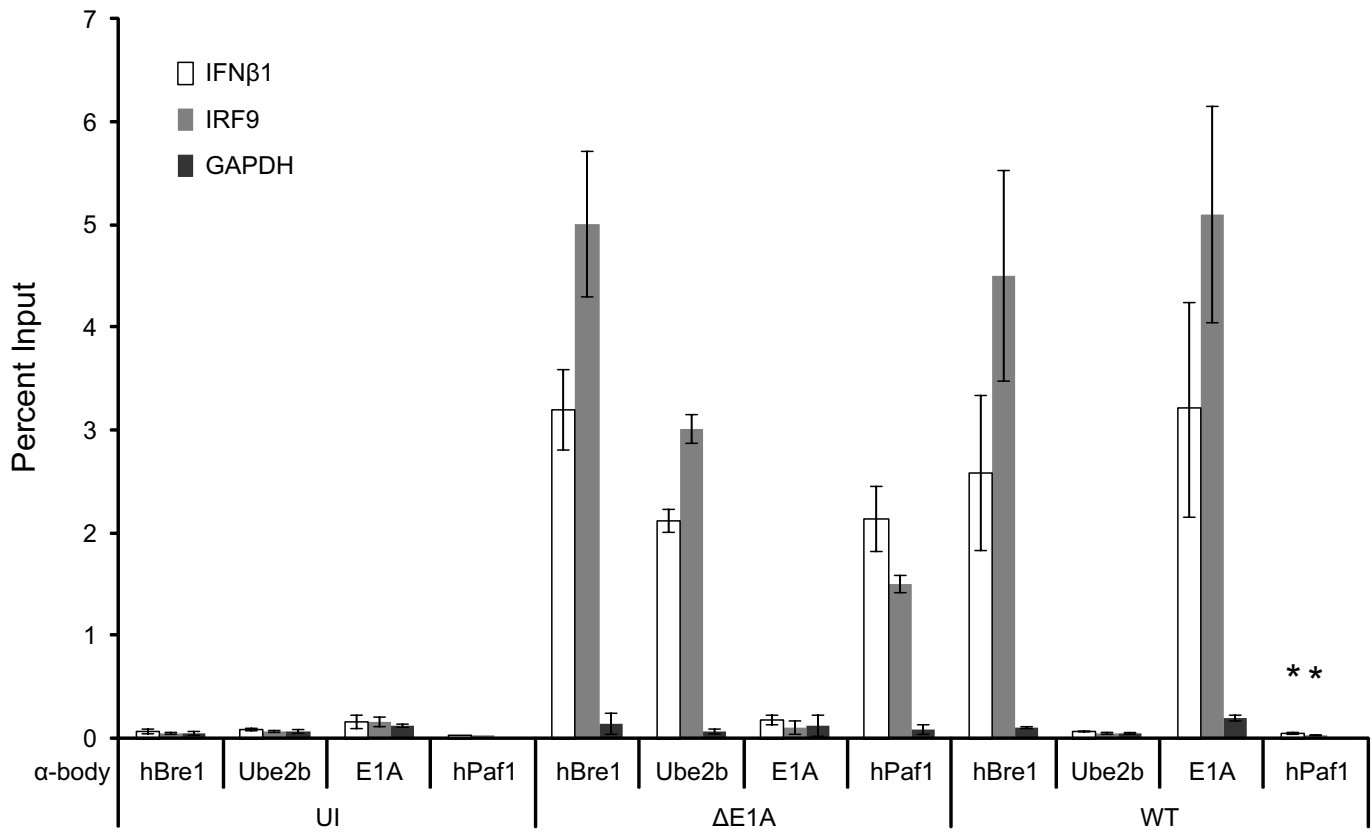

Figure S4

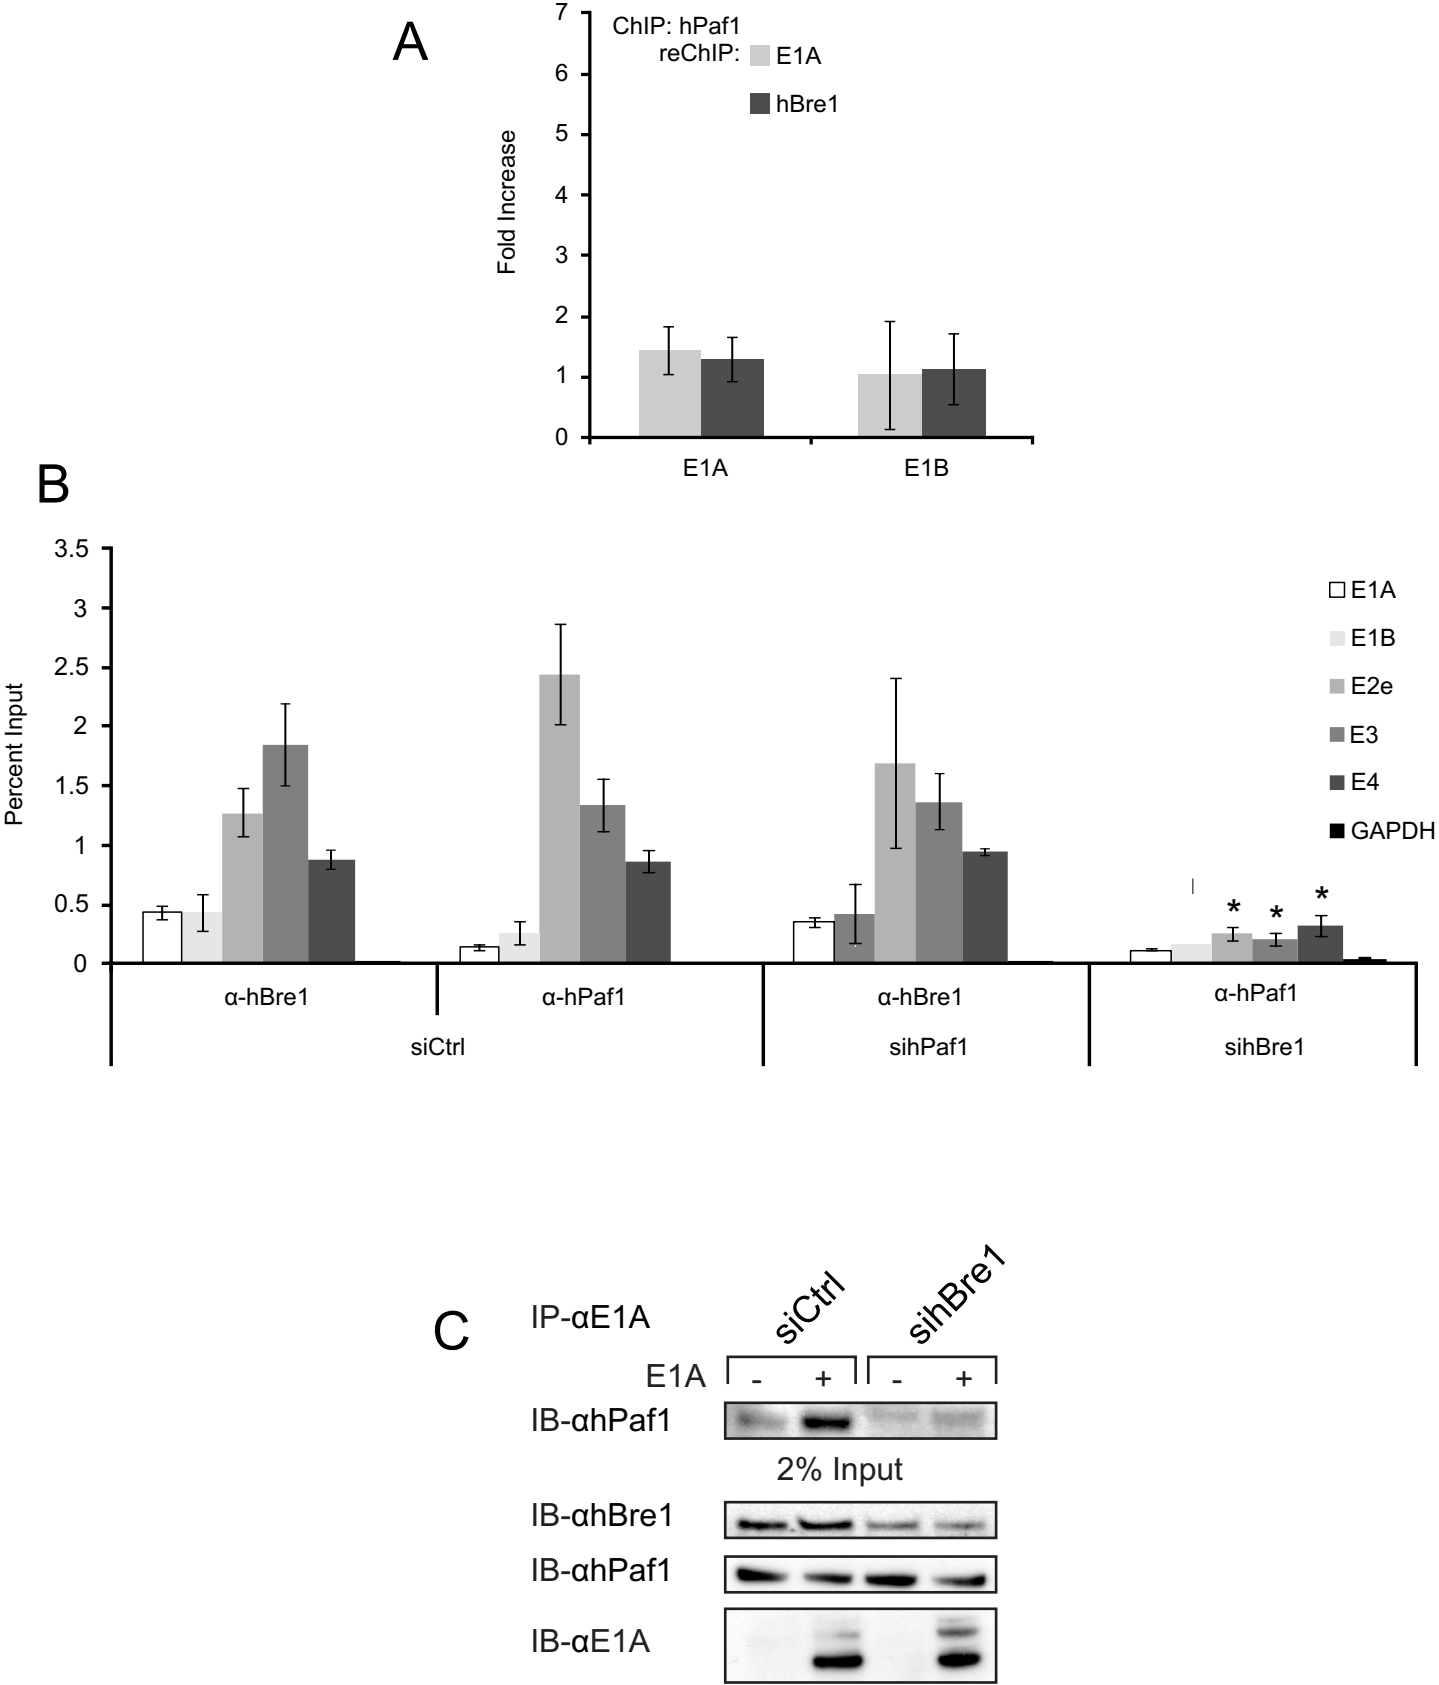

## Supplementary Figure Legends

**Figure S1.** Kinetics of virus infection under the conditions used for all experiments. (A) PCR detection of viral genome amplification. RT-qPCR was performed on DNA collected from the time course of infected cells using primers for the E1A promoter to detect copies of the viral genome and the GAPDH promoter to detect copies of the cellular genome. Results of WT infected cells were normalized to  $\Delta$ E1A HAdV and set as fold to the cellular genome via the GAPDH promoter. (B) HAdV late gene expression is not detected until 36 h.p.i. A549 cells were infected at an MOI of 5 with WT or  $\Delta$ E1A HAdV. Cells were collected at the indicated time points and RNA and DNA were collected. RT-qPCR was performed for the HAdV early transcripts E1A and the late genes E2I and L5, and normalized to GAPDH. Fold change to GAPDH was plotted. (C) HAdV late gene protein expression is detected at 48 h.p.i. A549 cells infected with WT virus were collected after 20 h.p.i. and protein was detected via western blotting with the indicated antibodies (E1A represents early gene expression and hexon represents late gene expression). n=2

**Figure S2.** HAdV early genes E1A, E1B, and E2e display varied hPTM states which do not include H2B-ub association. A549 cells were infected with WT HAdV or  $\Delta$ E1A HAdV for 20 hours. Chromatin immunoprecipitation (ChIP) was then performed with antibodies specific for the indicated histone or hPTMs. DNA was probed via qRT-PCR for the presence of HAdV early gene promoters E1A, E1B or E2e. Data was normalized to  $\Delta$ E1A HAdV and a non-specific antibody control. n=3

**Figure S3.** hPaf1 is excluded from IFN regulated genes during WT HAdV infection. ChIP assays were performed on A549 cells 20 hours after infection with the indicated viruses at a MOI of 5. ChIP was then performed using a control anti-mouse antibody or antibodies specific for hBre1, Ube2b, E1A, or hPaf1. hBre1, Ube2b and hPaf1 associate with IFN regulated gene bodies during IFN stimulating conditions ( $\Delta$ E1A virus infection). In contrast, in the presence of E1A, Ube2b and hPaf1 are excluded from IFN stimulated gene bodies (WT virus infection). A statistically significant decrease from  $\Delta$ E1A infected is indicated (\* P<0.01). n=3

**Figure S4.** hPaf1 recruitment to the E2e, E3 and E4 promoters requires E1A and hBre1 and the interaction of E1A with hPaf1 requires hBre1. (A) hPaf1 ChIP was followed by re-ChIP with either hBre1 or E1A specific antibodies to determine co-occupancy at the E1A and E1B promoters. Data was normalized to  $\Delta$ E1A HAdV and a non-specific antibody control. hPaf1 is not co-associated with E1A and hBre1 at these promoters. (B) hPaf1 recruitment to the E2e, E3 and E4 promoters requires hBre1. A549 cells were treated with a non-specific siRNA, or siRNA specific for hBre1, or hPaf1 prior to virus infection. ChIP assays were then performed using hBre1 or hPaf1 specific antibodies. hPaf1 and hBre1 occupancy was then determined at the HAdV E1A, E1B, E2e, E3 and E4 promoters as described above. A statistically significant decrease from Ctrl siRNA treatment is indicated (\*  $P < 0.01$ ) for B. (C) hPaf1 interacts with E1A and this is hBre1 dependent. A549 cells were treated with Ctrl or hBre1 specific siRNA and infected with WT or  $\Delta$ E1A virus. Cells were collected after 20 hours. Lysates were immunoprecipitated with anti-E1A antibody and probed for hPaf1. n=2

Table S1. List of primers used in this study.

| Target        | Region     | Location    | Forward                         | Reverse                     | Size |
|---------------|------------|-------------|---------------------------------|-----------------------------|------|
| IFN $\beta$ 1 | Transcript | 185-306     | AGTGTCAGAAGCTCCTGTGGCAA         | TGCGGCGTCCTCCTTCTGGA        | 122  |
| IRF9          | Transcript | 902-1010    | TTCCCAAGCCTGGCCACT              | GGCAAAGGCGCTGCACGAAG        | 109  |
| GAPDH         | Transcript | 566-644     | ACTGCTTAGCACCCCTGGCCAA          | ATGGCATGGACTGTGGTCATGAGTC   | 79   |
| E1A           | Transcript | 1-207       | ATGAGACATATTATCTGC              | TTAAGAGTCGGAAAAATCTG        | 207  |
| E1B           | Transcript | 1351-1474   | GGTGCAGACCCTGCGAGT              | CGCGCTGAGTTTGGCTCTAG        | 123  |
| E2e           | Transcript | 17-155      | GGGGGTGTTTTCGCGCTGCTCC          | GCGGATGAGCGGCGTATCGAG       | 138  |
| E2L           | Transcript | 7345-7474   | CTTGAATACTCAGAGAG               | GCCATGCGCGGGCGGCAAGCG       | 129  |
| E3            | Transcript | 170-297     | AGCTTTCTGAAATGTCCCGTCCGG        | CGAGGGCGGCTTTCGTACAGGG      | 127  |
| E4            | Transcript | 1-328       | ATGATTCGCTGCTGAGGCTG            | TTATTCCAAAAGATTATCCAAAACCTC | 329  |
| L5            | Transcript | 564-696     | GGGCATTGACTTGAAAGAGCCC          | TTATTAATAGTCACACCTGG        | 132  |
| E1A           | Promoter   | 332-527     | GCGCGTAATATTTGTCTAGGG           | GAAAACCTACTCGCTGGC          | 195  |
| E1B           | Promoter   | 1546-1708   | GGTGTAAACCTGTGATTGCG            | CAGATGTAACCAAGATTAGCCC      | 162  |
| E2e           | Promoter   | 7918-7793   | ACGAGCTGCTTCCCAAAG              | ATGGCCTTGATGGACAGC          | 125  |
| E3            | Promoter   | 27501-27633 | TCTGAAATGTCCCGTCCGG             | GGCGGCTTTCGTACAGGG          | 132  |
| E4            | Promoter   | 35585-35694 | CAGCTCAATCAGTCACAGTGTAAAAAGGGCC | TGCGGTTTTCTGGGTGTTTT        | 110  |

Table S2. List of antibodies used in this study.

| Reactivity                 | Description       | Company     | Cat #         |
|----------------------------|-------------------|-------------|---------------|
| Mouse IgG                  | Rabbit polyclonal | Sigma       | M-7023        |
| Actin                      | Rabbit polyclonal | Sigma       | A 2066        |
| GFP                        | Rabbit polyclonal | Clonetech   | 632592        |
| hPa1                       | Rabbit polyclonal | Bethyl Labs | A300-173A     |
| H2B                        | Rabbit polyclonal | Millipore   | 07-371        |
| H2BK120-monoubiquitination | Mouse monoclonal  | Millipore   | 05-1312       |
| H3K4 tri methylation       | Mouse monoclonal  | Abcam       | Ab1012        |
| H3K18 acetylation          | Rabbit polyclonal | Abcam       | Ab1191        |
| H3K79 tri methylation      | Rabbit polyclonal | Abcam       | Ab2621        |
| hBre1/RNF20                | Mouse monoclonal  | Sigma       | R8904         |
| M73 (E1A)                  | Mouse monoclonal  | In house    |               |
| RNA Pol II                 | Rabbit polyclonal | Abcam       | Ab26721       |
| RNF40/hBre1b/RBP95         | Mouse monoclonal  | Sigma       | R9029         |
| Ube2b/hRad6                | Rabbit polyclonal | Bethyl Labs | A300-281A     |
| 9C12 (hexon)               | Mouse monoclonal  | DSHB        | TC31-9C12.C9  |
| 27F11 (hexon)              | Mouse monoclonal  | DSHB        | TC31-27F11.C2 |
